# Supplementary material
Source: MDPI journal article supplement (https://www.mdpi.com/2311-553X/10/1/3)
Supplement: s1 [file s1]

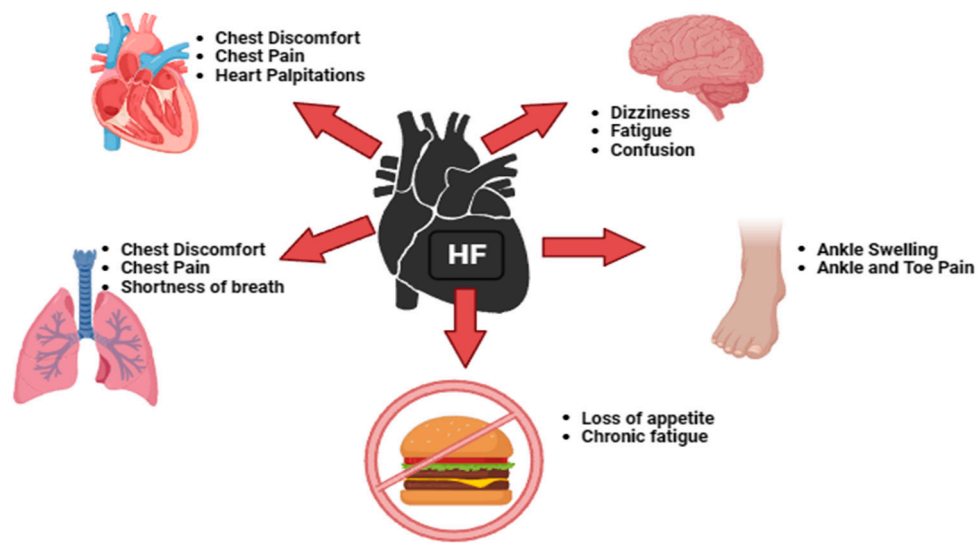

**Figure S1.** A general list of symptoms localized to specific organs and regions that are an indication of heart failure.
